# Supplementary material for: Methylation Status of Corticotropin-Releasing Factor (CRF) Receptor Genes in Colorectal Cancer
Source: MDPI journal article supplement (doi:10.3390/jcm10122680), 2021-06-18
Supplement: s1 [file s1]

**Table S1: DMCs identified by *in silico* analysis in *CRFR1* among studied groups.**

| STUDY     | CG ID      | Correlation               | Mean $\beta$<br>value 1* | Mean $\beta$<br>value 2* | $\Delta \beta$<br>value# | Methylation<br>in disease vs<br>normal | Location<br>relative to<br>gene | Location<br>relative<br>to CpG | FDR       |
|-----------|------------|---------------------------|--------------------------|--------------------------|--------------------------|----------------------------------------|---------------------------------|--------------------------------|-----------|
| GSE149282 | cg00025823 | Adjacent vs<br>CRC tissue | 0.491                    | 0.298                    | -0.193                   | Down                                   | Gene body                       |                                | 7.209E-03 |
| GSE149282 | cg02810898 | Adjacent vs<br>CRC tissue | 0.798                    | 0.621                    | -0.177                   | Down                                   | 5'UTR                           |                                | 3.188E-02 |
| GSE149282 | cg03066966 | Adjacent vs<br>CRC tissue | 0.591                    | 0.335                    | -0.256                   | Down                                   | 5'UTR                           |                                | 1.003E-03 |
| GSE149282 | cg03323388 | Adjacent vs<br>CRC tissue | 0.803                    | 0.587                    | -0.217                   | Down                                   | 5'UTR                           |                                | 8.953E-04 |
| GSE149282 | cg07657976 | Adjacent vs<br>CRC tissue | 0.825                    | 0.483                    | -0.342                   | Down                                   | 5'UTR                           |                                | 2.459E-03 |
| GSE149282 | cg07778819 | Adjacent vs<br>CRC tissue | 0.138                    | 0.554                    | +0.416                   | Up                                     | GB                              | Island                         | 2.871E-07 |
| GSE149282 | cg00022871 | Adjacent vs<br>CRC tissue | 0.637                    | 0.349                    | -0.288                   | Down                                   | GB                              |                                | 2.446E-04 |
| GSE149282 | cg09422970 | Adjacent vs<br>CRC tissue | 0.492                    | 0.163                    | -0.329                   | Down                                   | 5'UTR                           |                                | 3.674E-06 |
| GSE149282 | cg10106856 | Adjacent vs<br>CRC tissue | 0.870                    | 0.651                    | -0.219                   | Down                                   | 5'UTR                           |                                | 4.361E-02 |
| GSE149282 | cg10256584 | Adjacent vs<br>CRC tissue | 0.770                    | 0.626                    | -0.144                   | Down                                   | 5'UTR                           |                                | 5.594E-02 |
| GSE149282 | cg11731737 | Adjacent vs<br>CRC tissue | 0.079                    | 0.265                    | +0.186                   | Up                                     | GB                              | Island                         | 2.621E-02 |
| GSE149282 | cg14297797 | Adjacent vs<br>CRC tissue | 0.381                    | 0.147                    | -0.235                   | Down                                   | 5'UTR                           |                                | 5.261E-03 |
| GSE149282 | cg15117716 | Adjacent vs<br>CRC tissue | 0.517                    | 0.158                    | -0.359                   | Down                                   | 5'UTR                           |                                | 4.155E-06 |
| GSE149282 | cg15607306 | Adjacent vs<br>CRC tissue | 0.913                    | 0.725                    | -0.188                   | Down                                   | GB                              |                                | 1.366E-03 |
| GSE149282 | cg16642545 | Adjacent vs<br>CRC tissue | 0.614                    | 0.357                    | -0.257                   | Down                                   | GB                              |                                | 1.029E-03 |
| GSE149282 | cg16830379 | Adjacent vs<br>CRC tissue | 0.745                    | 0.554                    | -0.191                   | Down                                   | 3'UTR                           |                                | 8.893E-03 |
| GSE149282 | cg17311440 | Adjacent vs<br>CRC tissue | 0.686                    | 0.373                    | -0.313                   | Down                                   | 5'UTR                           |                                | 1.764E-05 |
| GSE149282 | cg27551605 | Adjacent vs<br>CRC tissue | 0.088                    | 0.330                    | +0.243                   | Up                                     | GB                              | Island                         | 1.541E-04 |
| GSE149282 | cg23420656 | Adjacent vs<br>CRC tissue | 0.429                    | 0.195                    | -0.234                   | Down                                   | 5'UTR                           | S_Shelf                        | 4.167E-03 |
| GSE149282 | cg24394631 | Adjacent vs<br>CRC tissue | 0.206                    | 0.475                    | +0.269                   | Up                                     | Gene body                       | S_Shore                        | 2.585E-05 |
| GSE149282 | cg24738082 | Adjacent vs<br>CRC tissue | 0.887                    | 0.723                    | -0.165                   | Down                                   | 5'UTR                           |                                | 6.352E-03 |
| GSE149282 | cg26656751 | Adjacent vs<br>CRC tissue | 0.678                    | 0.391                    | -0.286                   | Down                                   | GB                              |                                | 1.235E-04 |
| GSE149282 | cg27410679 | Adjacent vs<br>CRC tissue | 0.496                    | 0.153                    | -0.343                   | Down                                   | GB                              | S_Shelf                        | 6.879E-06 |
| GSE149282 | cg18757974 | Adjacent vs<br>CRC tissue | 0.062                    | 0.218                    | +0.156                   | Up                                     | TSS1500                         | Island                         | 7.654E-03 |
| GSE149282 | cg12577105 | Adjacent vs<br>CRC tissue | 0.047                    | 0.163                    | +0.116                   | Up                                     | TSS1500                         | Island                         | 8.456E-03 |
| GSE149282 | cg13521908 | Adjacent vs<br>CRC tissue | 0.077                    | 0.249                    | +0.172                   | Up                                     | 1st Exon                        | Island                         | 3.136E-03 |
| GSE149282 | cg11338426 | Adjacent vs               | 0.103                    | 0.269                    | +0.166                   | Up                                     | 1st Exon                        | Island                         | 1.786E-02 |

|            |            |                        |       |       |        |      |          |         |           |
|------------|------------|------------------------|-------|-------|--------|------|----------|---------|-----------|
| CRC tissue |            |                        |       |       |        |      |          |         |           |
| GSE149282  | cg08929103 | Adjacent vs CRC tissue | 0.563 | 0.239 | -0.323 | Down | TSS1500  | N_Shore | 4.453E-05 |
| GSE149282  | cg08473090 | Adjacent vs CRC tissue | 0.089 | 0.330 | +0.241 | Up   | TSS1500  | Island  | 3.174E-03 |
| GSE1222126 | cg00022871 | Healthy vs CRC ccfDNA  | 0.875 | 0.670 | -0.205 | Down | GB       |         | 2.533E-03 |
| GSE1222126 | cg10256584 | Healthy vs CRC ccfDNA  | 0.909 | 0.836 | -0.073 | Down | 5'UTR    |         | 8.778E-03 |
| GSE1222126 | cg11524343 | Healthy vs CRC ccfDNA  | 0.377 | 0.631 | +0.254 | Up   | 5'UTR    |         | 1.382E-02 |
| GSE1222126 | cg11760414 | Healthy vs CRC ccfDNA  | 0.386 | 0.495 | +0.109 | Up   | 5'UTR    | S_Shore | 5.105E-02 |
| GSE1222126 | cg13947929 | Healthy vs CRC ccfDNA  | 0.391 | 0.488 | +0.097 | Up   | GB       | S_Shore | 2.432E-02 |
| GSE1222126 | cg15117716 | Healthy vs CRC ccfDNA  | 0.855 | 0.418 | -0.438 | Down | 5'UTR    |         | 1.166E-04 |
| GSE1222126 | cg15607306 | Healthy vs CRC ccfDNA  | 0.941 | 0.889 | -0.051 | Down | GB       |         | 4.413E-02 |
| GSE1222126 | cg16642545 | Healthy vs CRC ccfDNA  | 0.764 | 0.436 | -0.328 | Down | GB       |         | 1.991E-03 |
| GSE1222126 | cg16830379 | Healthy vs CRC ccfDNA  | 0.875 | 0.715 | -0.160 | Down | 3'UTR    |         | 1.130E-04 |
| GSE1222126 | cg24063856 | Healthy vs CRC ccfDNA  | 0.231 | 0.390 | +0.159 | Up   | GB       | S_Shore | 1.658E-03 |
| GSE1222126 | cg24738082 | Healthy vs CRC ccfDNA  | 0.931 | 0.863 | -0.068 | Down | 5'UTR    |         | 2.627E-03 |
| GSE1222126 | cg27410679 | Healthy vs CRC ccfDNA  | 0.689 | 0.363 | -0.326 | Down | GB       | S_Shelf | 1.740E-03 |
| GSE1222126 | cg08929103 | Healthy vs CRC ccfDNA  | 0.767 | 0.477 | -0.291 | Down | TSS1500  | N_Shore | 1.261E-03 |
| GSE1222126 | cg13521908 | Healthy vs CRC ccfDNA  | 0.117 | 0.213 | +0.096 | Up   | 1st Exon | Island  | 2.545E-02 |
| GSE105798  | cg13947929 | Normal vs CD           | 0.302 | 0.452 | +0.150 | Up   | GB       | S_Shore | 1.581E-03 |
| GSE105798  | cg00025823 | Normal vs CD           | 0.475 | 0.606 | +0.130 | Up   | GB       |         | 9.794E-03 |
| GSE105798  | cg24063856 | Normal vs CD           | 0.185 | 0.347 | +0.162 | Up   | GB       | S_Shore | 5.160E-03 |

\*Mean  $\beta$  value 1 represents methylation in normal and Mean  $\beta$  value 2 methylation in disease; # $\Delta$   $\beta$  value: Mean  $\beta$  value 2-Mean  $\beta$  value 1. Open rows correspond to DMCs located at the gene body and shaded rows to DMCs located at the 1<sup>st</sup> Exon or close to TSS. GB: Gene Body; DMCs: Differentially methylated CpGs; CRC: Colorectal Cancer; FDR: False Discovery Rate; ccfDNA: circulating cell-free DNA; CD: Crohn’s disease

**Table S2: DMCs identified by *in silico* analysis in *CRFR2* among studied groups.**

| Study     | CpG ID     | Correlation               | Mean $\beta$<br>value 1* | Mean $\beta$<br>value 2* | $\Delta \beta$<br>value# | Methylation<br>in disease vs<br>normal | Location<br>relative<br>to gene | Location<br>relative<br>to CpG | FDR       |
|-----------|------------|---------------------------|--------------------------|--------------------------|--------------------------|----------------------------------------|---------------------------------|--------------------------------|-----------|
| GSE149282 | cg01049782 | Adjacent vs<br>CRC tissue | 0.607                    | 0.188                    | -0.418                   | Down                                   | GB                              | N_Shelf                        | 3.314E-02 |
| GSE149282 | cg01819552 | Adjacent vs<br>CRC tissue | 0.658                    | 0.348                    | -0.311                   | Down                                   | GB                              |                                | 6.482E-02 |
| GSE149282 | cg03484834 | Adjacent vs<br>CRC tissue | 0.650                    | 0.461                    | -0.189                   | Down                                   | GB                              |                                | 1.305E-02 |
| GSE149282 | cg03667083 | Adjacent vs<br>CRC tissue | 0.622                    | 0.775                    | +0.153                   | Up                                     | GB                              | N_Shore                        | 8.689E-02 |
| GSE149282 | cg05366813 | Adjacent vs<br>CRC tissue | 0.580                    | 0.287                    | -0.293                   | Down                                   | GB                              | S_Shore                        | 2.593E-02 |
| GSE149282 | cg05877083 | Adjacent vs<br>CRC tissue | 0.807                    | 0.475                    | -0.332                   | Down                                   | GB                              |                                | 2.812E-02 |
| GSE149282 | cg06866646 | Adjacent vs<br>CRC tissue | 0.840                    | 0.500                    | -0.340                   | Down                                   | GB                              |                                | 2.476E-02 |
| GSE149282 | cg09516959 | Adjacent vs<br>CRC tissue | 0.238                    | 0.530                    | +0.292                   | Down                                   | GB                              | Island                         | 1.463E-04 |
| GSE149282 | cg12511160 | Adjacent vs<br>CRC tissue | 0.043                    | 0.026                    | -0.017                   | Down                                   | GB                              |                                | 5.222E-02 |
| GSE149282 | cg16127724 | Adjacent vs<br>CRC tissue | 0.705                    | 0.545                    | -0.159                   | Down                                   | GB                              |                                | 1.089E-03 |
| GSE149282 | cg16755766 | Adjacent vs<br>CRC tissue | 0.600                    | 0.254                    | -0.346                   | Down                                   | GB                              |                                | 1.128E-03 |
| GSE149282 | cg17924854 | Adjacent vs<br>CRC tissue | 0.636                    | 0.310                    | -0.326                   | Down                                   | GB                              |                                | 4.340E-04 |
| GSE149282 | cg23185751 | Adjacent vs<br>CRC tissue | 0.800                    | 0.503                    | -0.297                   | Down                                   | GB                              | N_Shore                        | 2.140E-02 |
| GSE149282 | cg24430106 | Adjacent vs<br>CRC tissue | 0.953                    | 0.786                    | -0.166                   | Down                                   | GB                              |                                | 1.194E-03 |
| GSE149282 | cg27191795 | Adjacent vs<br>CRC tissue | 0.894                    | 0.625                    | -0.269                   | Down                                   | GB                              | N_Shelf                        | 1.160E-04 |
| GSE149282 | cg01718447 | Adjacent vs<br>CRC tissue | 0.126                    | 0.536                    | +0.410                   | Up                                     | TSS200                          | Island                         | 2.375E-03 |
| GSE149282 | cg02712145 | Adjacent vs<br>CRC tissue | 0.166                    | 0.471                    | +0.305                   | Up                                     | TSS1500                         | Island                         | 2.785E-02 |
| GSE149282 | cg04922810 | Adjacent vs<br>CRC tissue | 0.077                    | 0.435                    | +0.358                   | Up                                     | 1st Exon                        | Island                         | 7.024E-03 |
| GSE149282 | cg07658503 | Adjacent vs<br>CRC tissue | 0.051                    | 0.313                    | +0.262                   | Up                                     | TSS200                          | Island                         | 3.165E-02 |
| GSE149282 | cg13094036 | Adjacent vs<br>CRC tissue | 0.089                    | 0.343                    | +0.254                   | Up                                     | TSS1500                         | Island                         | 3.663E-03 |
| GSE149282 | cg14896516 | Adjacent vs<br>CRC tissue | 0.106                    | 0.352                    | +0.246                   | Up                                     | TSS1500                         | Island                         | 1.861E-04 |
| GSE149282 | cg18266052 | Adjacent vs<br>CRC tissue | 0.100                    | 0.418                    | +0.318                   | Up                                     | 1 <sup>st</sup> Exon            | Island                         | 4.872E-02 |
| GSE149282 | cg21773872 | Adjacent vs<br>CRC tissue | 0.146                    | 0.655                    | +0.509                   | Up                                     | TSS200                          | Island                         | 1.242E-06 |
| GSE149282 | cg24214442 | Adjacent vs<br>CRC tissue | 0.123                    | 0.463                    | +0.340                   | Up                                     | 1 <sup>st</sup> Exon            | Island                         | 3.225E-06 |
| GSE149282 | cg24610236 | Adjacent vs<br>CRC tissue | 0.074                    | 0.451                    | +0.378                   | Up                                     | 1 <sup>st</sup> Exon            | Island                         | 1.568E-05 |
| GSE149282 | cg27430726 | Adjacent vs<br>CRC tissue | 0.133                    | 0.457                    | +0.325                   | Up                                     | 1 <sup>st</sup> Exon            | Island                         | 7.102E-05 |

|            |            |                          |       |       |        |      |          |         |           |
|------------|------------|--------------------------|-------|-------|--------|------|----------|---------|-----------|
| GSE1222126 | cg16127724 | Healthy vs<br>CRC ccfDNA | 0.884 | 0.676 | -0.207 | Down | GB       |         | 6.867E-05 |
| GSE1222126 | cg16755766 | Healthy vs<br>CRC ccfDNA | 0.767 | 0.422 | -0.345 | Down | GB       |         | 2.801E-06 |
| GSE1222126 | cg01819552 | Healthy vs<br>CRC ccfDNA | 0.813 | 0.585 | -0.228 | Down | GB       |         | 6.859E-04 |
| GSE1222126 | cg01049782 | Healthy vs<br>CRC ccfDNA | 0.778 | 0.327 | -0.451 | Up   | GB       | N_Shelf | 5.024E-03 |
| GSE1222126 | cg01972879 | Healthy vs<br>CRC ccfDNA | 0.797 | 0.887 | +0.090 | Up   | GB       | N_Shore | 2.583E-04 |
| GSE1222126 | cg03667083 | Healthy vs<br>CRC ccfDNA | 0.583 | 0.757 | +0.174 | Up   | GB       | N_Shore | 2.023E-02 |
| GSE1222126 | cg05366813 | Healthy vs<br>CRC ccfDNA | 0.850 | 0.643 | -0.207 | Down | GB       | S_Shore | 2.511E-03 |
| GSE1222126 | cg22826063 | Healthy vs<br>CRC ccfDNA | 0.859 | 0.714 | -0.145 | Down | GB       |         | 2.428E-02 |
| GSE1222126 | cg06175988 | Healthy vs<br>CRC ccfDNA | 0.686 | 0.479 | -0.208 | Down | GB       | N_Shelf | 4.417E-02 |
| GSE1222126 | cg27191795 | Healthy vs<br>CRC ccfDNA | 0.934 | 0.755 | -0.178 | Down | GB       | N_Shelf | 8.228E-07 |
| GSE1222126 | cg04863452 | Healthy vs<br>CRC ccfDNA | 0.053 | 0.110 | +0.057 | Up   | TSS200   | Island  | 1.065E-03 |
| GSE1222126 | cg18351440 | Healthy vs<br>CRC ccfDNA | 0.885 | 0.806 | -0.079 | Down | TSS1500  | N_Shelf | 3.929E-05 |
| GSE1222126 | cg04923928 | Healthy vs<br>CRC ccfDNA | 0.045 | 0.143 | +0.098 | Up   | 1st Exon | Island  | 1.665E-04 |
| GSE1222126 | cg15615793 | Healthy vs<br>CRC ccfDNA | 0.486 | 0.629 | +0.142 | Up   | TSS1500  | S_Shore | 9.913E-03 |
| GSE105798  | cg01972879 | Normal vs<br>CD          | 0.869 | 0.779 | -0.089 | Down | GB       | N_Shore | 2.641E-03 |
| GSE105798  | cg21773872 | Normal vs<br>CD          | 0.089 | 0.041 | -0.049 | Down | TSS200   | Island  | 2.386E-04 |

\*Mean  $\beta$  value 1 represents methylation in normal and Mean  $\beta$  value 2 represents methylation in disease;  $\Delta \beta$  value: Mean  $\beta$  value 2-Mean  $\beta$  value 1. Open rows correspond to DMCs located at the gene body and shaded rows to DMCs located at the 1st Exon or close to TSS. GB: Gene Body; DMCs: Differentially methylated CpGs; CRC: Colorectal Cancer; FDR:False Discovery Rate; ccfDNA: circulating cell-free DNA; CD: Crohn's disease.
